# Supplementary material for: Expression of Immunomodulatory Checkpoint Molecules in Drug-Resistant Neuroblastoma: An Exploratory Study
Source: MDPI journal article supplement (doi:10.3390/cancers14030751), 2022-01-31
Supplement: s1 [file s1]

# Supplementary Materials: Expression of Immunomodulatory Checkpoint Molecules in Drug-Resistant Neuroblastoma: An Exploratory Study

Nicholas J. Skertich, Fei Chu, Imad A.M. Tarhoni, Stephen Szajek, Jeffrey A. Borgia and Mary Beth Madonna

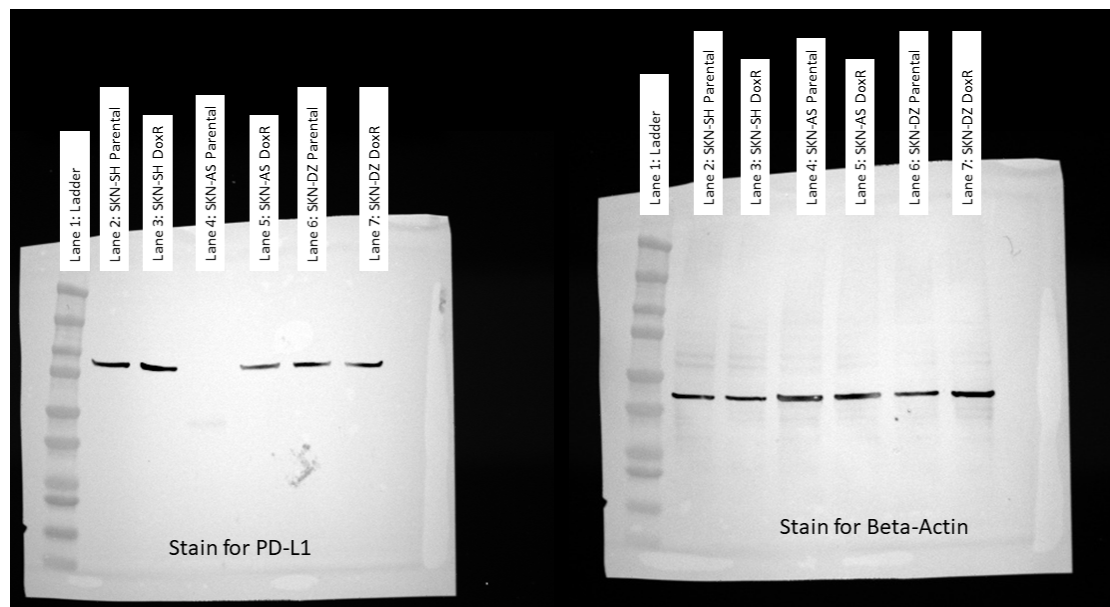

Figure S1. the uncropped western blot figures.
